# Supplementary material
Source: publisher site journal article supplement (https://www.degruyterbrill.com/publication/journal_key/PDTC/downloadAsset/PDTC_PDTC_Call%20for%20Papers.pdf)
Supplement: Supplementary file 1 [file PDTC_PDTC_Call%20for%20Papers.pdf]

# Preservation, Digital Technology & Culture - PDT&C

ISSN: Online 2195-2965; Print 2195-2957

<https://www.degruyterbrill.com/pdtc>

## Call for Papers

Preservation, Digital Technology & Culture (PDT&C) is an international Open Access refereed journal of high scholarly standing, based on [Subscribe-to-Open](#), an alternative model that enables the full Open Access transformation of journals through the continuation of existing subscriptions on a year-by-year basis. PDT&C does not charge publication costs for the authors. All articles in English language and of high academic quality that are within the journal's scope are subject to double-blind peer-review process by external reviewers. Please check the [Instructions for Authors](#) document for additional information.

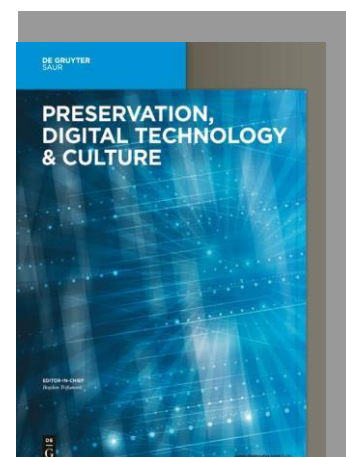

## Scope

PDT&C seeks original, scholarly articles that engage theoretical and practical perspectives on preservation, access, and use of digital content, including technological, social, economic, political, and user perspective. We welcome a variety of analytic frameworks and methodologies, including empirical, critical, and case study approaches.

We are particularly interested in articles that touch upon the following areas (the list is not exhaustive):

- Digital preservation and curation;
- Big/smart data approaches to preservation;
- Cultural heritage informatics, including digital archives and libraries, and digital humanities;
- Community archiving and preservation of digital heritage;
- Personal archiving of digital records and objects;
- Use of digital technologies and cultural collections to empower Indigenous knowledge, decolonisation and identity;
- Convergence of libraries, archives, and museums through information technologies such as digitization and linked data;
- Creation, design, evaluation, and use of collections, records, data/metadata, and digital asset management systems for cultural heritage resources;
- Sustainability of preservation projects and programs;
- Environmental impacts of preservation work;
- Cultural perspectives of human-computer interaction;
- Uses/reuses and users of cultural heritage materials, including creation of exhibits, digital storytelling, and narratives.

We also welcome reports on current digital preservation projects, conferences and symposia, and research in progress, as well as reviews of relevant books and other resources.

## Submission

Online submission of Manuscripts at our [Online Submission Tool](#)

### Submission process:

- Please submit your manuscript online via our [Online Submission Tool](#) following the [StyleSheet](#) and [Instructions for Authors](#)
- Online ahead of print publication for all papers accepted after peer reviewing procedure. All contributions go through a double-blind peer review with at least two external reviewers. Please note that your manuscript may be checked for plagiarism via Crossref Similarity Check
- The Call for Papers is open year-round

### Your benefits of publishing with us (check our [Ranking](#)):

- Instant golden OA (CC-BY) in S2O without APCs (authors retain rights)
- Wide indexing and abstracting
- Insightful reviews
- High quality manuscript processing through ScholarOne Manuscripts
- Every article easily discoverable because of Search Engine Optimization (SEO) and comprehensive [abstracting and indexing services](#)
- Secure archiving by De Gruyter and the independent archiving service Portico
- Professional sales and marketing activities

### Please note:

- PDT&C follows [Tier 2](#) of our [Data Sharing Policy](#). Authors are encouraged to provide a data availability statement. Please refer to the Data Sharing Policy for guidance on how to write a data availability statement.
- Contributions submitted to this journal must be written in clear and concise English
- Before submitting a paper please get familiar with our [Statement on Publication Ethics](#) and [Copyright Transfer Agreement](#)
- If you have any general questions please visit our [FAQ for authors](#)

### Have additional questions or proposals?

Article proposals and abstracts of proposed submissions may be sent to Bogdan Trifunović, Editor-in-Chief ([pdteic@gmail.com](mailto:pdteic@gmail.com)) and for general inquiries contact Alicja Kanclerz, Journal Coordinator ([alicja.kanclerz@degruyterbrill.com](mailto:alicja.kanclerz@degruyterbrill.com)).

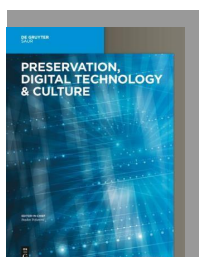

Preservation, Digital Technology & Culture (PDT&C) ISSN: Online 2195-2965; Print 2195-2957

License: Articles published under the Creative Commons license CC-BY

Language: English

Publisher: De Gruyter Brill

First published: March 26, 2013 (formerly published as Microform & Digitization Review)

Publication Frequency: 4 Issues per Year
